# Supplementary material
Source: PubMed Central journal article supplement (PMC8562963)

# SUPPLEMENTARY MATERIALS

## Supplementary Methods

### *Detailed description of the models*

The three models used in this study were developed as part of National Cancer Institute (NCI)'s Cancer Intervention and Surveillance Modeling Network (CISNET) Breast Working Group. The three models include model D (Dana Farber Cancer Institute) [1], model G-E (Georgetown University-Albert Einstein College of Medicine) [2], and model W-H (University of Wisconsin-Madison, Madison, Wisconsin, and Harvard Medical School, Boston, Massachusetts) [3]. The three models were independently developed to evaluate the impact of breast cancer control interventions on long-term trends in breast cancer incidence and mortality in the US. All three models have the ability to follow multiple birth cohorts over time and use common data on other-cause mortality, screening behavior, screening performance, breast cancer subtype distribution, treatment use, and treatment efficacy. The details of model inputs, assumptions, and structure are described extensively at the CISNET website (<http://cisnet.cancer.gov/breast/profiles.html>) and in prior publications [1-5].

The models start with estimates of overall breast cancer incidence and survival trends in the absence of screening or adjuvant treatment and then overlay data on screening use, screening accuracy, and reductions in mortality associated with adjuvant treatment for each molecular subtype to match observed U.S. population incidence and mortality over time. Models represent natural history of breast cancer using different structures. **Supplementary Table 1** compares the key assumptions used in the models.

As described in the main text, a major strength of CISNET models is that high-quality data are used as common input. Mammography utilization and performance, cancer stage distribution by mode of detection, and ER/HER2 joint distributions among diagnosed cancers are provided by NCI-funded Breast Cancer Surveillance Consortium (BCSC), a collaborative network of six breast imaging registries that have been collecting information from 291 radiology facilities since 1996 [5, 8, 9]. BCSC links imaging data to tumor registry and pathology data [9]. Breast cancer treatment patterns and effectiveness over time are informed by data from National Comprehensive Cancer Network, meta-analyses, and clinical trial results [5, 10-16], and death due to non-breast cancer reasons was estimated from the Centers for Disease Control and Prevention (CDC) Wide-ranging ONline Data for Epidemiologic Research (WONDER) database [17].

Among key common inputs of CISNET models, an important parameter for this analysis is the use of mammography screening over time. The mammography dissemination model was originally developed by Cronin et. al. [18, 19] using data from BCSC and National Health Information Survey and has since been updated to reflect the changes in screening modalities over time in the US [5]. The model captures trends in screening usage patterns including changes in frequency by age over time. We assume all screened women are categorized into three screening groups based on age: annual screeners are women with a mean interval between consecutive screening exams of <1.5 years, biennial screeners are women with a mean interval of 1.5-2.5 years, and irregular screeners are women with a mean interval of >2.5 years. Each screening group's time interval between subsequent mammograms is estimated using stratified survival analyses.

Briefly, model D (Dana-Farber Cancer Institute) is a stochastic model depicting the early detection process of screening and predicts breast cancer mortality as a function of disease natural history, detection, and treatment [1]. Model D is unique among CISNET breast cancer models in that it is entirely analytical. Model D models DCIS by including transitions from normal breast tissue to a pre-clinical undetectable DCIS state, and progression to a screen detectable DCIS or screen detectable invasive cancer state. Furthermore, model D represents recurrence of breast cancer.

Model G-E (Georgetown University-Albert Einstein College of Medicine) is a continuous-time, event-driven microsimulation utilizing a parallel universes approach is implemented in the C++ programming language and is specifically oriented toward estimating the impact of screening and adjuvant treatment innovations that have taken place since 1975 [2]. Life history in the absence of intervention is generated for each woman and the effects of screening and treatment are overlaid on this life history. Natural history is simulated phenomenologically relying on dates, stage, and age of clinical and screen detection, and recurrence of a tumor by molecular subtype. Model G-E can model the simultaneous, sequential, or interleaved use of multiple screening technologies having different detection characteristics.

Model W-H (University of Wisconsin-Madison and Harvard Medical School) is a discrete-event micro-simulation model that uses a systems engineering approach to replicate breast cancer epidemiology in the U.S. population over time [3]. The model, programmed in C++ with over 20,000 lines of code, runs on both Microsoft Windows and UNIX platforms. It was developed at the University of Wisconsin-Madison and has been continuously maintained and enhanced for over 20 years. Model W-H is a population-based model that simulates the lifetimes of individual women through the interaction of four main components: breast cancer natural history, detection, treatment and mortality. Each woman enters the model at age 20 and ages in 6 month cycle times. A unique feature of model W-H is that it accounts for the possibility that a fraction of tumors are of limited malignant potential and therefore does not pose a lethal threat.

### ***Details of the parameter estimation for the pandemic scenarios***

Scenario 2, modeling reduction in screening, was informed in part by data from Epic Health Research Network, which pooled data from 60 healthcare organizations representing 306 hospitals that span 28 states and cover 10 million patients. According to Epic Health Research Network data, breast cancer screening rates fell 63% during March 15- June 16, 2020, and were 29% lower in the week of June 16 compared to pre-pandemic screening rates in 2017, 2018, and 2019 [20]. Assuming that a 29% reduction in screening rates persisted through September, we estimated the overall reduction in screening rates for the six month period to be equal to 47%. A similar magnitude and duration of the drop and recovery of screening mammography volume has been observed within the BCSC. As a result, in Scenario 2, we assumed that there is a 50% reduction in screening rates.

Scenario 3, modeling delays in diagnosis of symptomatic cases, was informed in part by data from two registries within the BCSC, as illustrated in the following figure. Clinical indication for mammography exams in the BCSC is coded as 1) Screening; 2) Additional evaluation of a recent mammogram; 3) Short interval follow-up; and 4) Evaluation of a Breast Problem (symptomatic). The numbers of exams coded as 4) Evaluation of a Breast Problem (symptomatic) provides evidence regarding the number of women seeking diagnostic imaging for breast symptoms. We determined the monthly count of these exams for each month January through June 2020 and divided by the average monthly count prior to the pandemic.

**Supplementary Table 2** shows how we modified the treatment input for the use of chemotherapy due to pandemic effect. As noted in the main text, our reduced treatment scenario reduced the use of chemotherapy only for women who are diagnosed in Stage I and Stage IIa with ER+/HER2- subtype. The rates of endocrine therapy were not modified from their base levels. In addition, the rate of reduction was 50% in women younger than 70 and 25% for women older than 70.

**Supplementary Figures 2** shows how models replicated observed age-adjusted mortality rates as reported by the NCI's SEER database between 2010 and 2017. **Supplementary Figure 2** presents age-adjusted rates including women in ages between 30 and 84. **Supplementary Figures 3 and 4** presents base-case results obtained by models D and GE.

#### *Details of the base-case and sensitivity analysis results*

We present the complete base-case results for our exemplary model (model W-H) in **Supplementary Tables 3-7**. **Supplementary Figures 5 and 6** show cumulative excess breast cancer mortality according to model D and model GE over time when the pandemic-related disruptions last for 12 months. For all of the other sensitivity analyses, all of the results are generated by using only the exemplary model (model W-H) unless noted otherwise. The results of the sensitivity analyses are given in **Supplementary Tables 8-15**. For the sensitivity analysis on other-cause mortality, we used the recent publication by the Centers for Disease Control and Prevention (CDC) which reported a detailed age-specific impact of COVID-19 on mortality [21]. For example, it is reported that COVID-19 increased mortality rates by 12% for the 65-74 age group [21]. We used the rates reported by the CDC report and assumed that the increase in other-cause mortality would be the same in 2020 and 2021 due to pandemic and did this sensitivity analysis and reported the results in Supplementary Table 15.

## Supplementary References

1. Lee SJ, Li X, Huang H, *et al.* The Dana-Farber CISNET model for breast cancer screening strategies: An update. *Medical Decision Making* 2018;38(1\_suppl):44S-53S.
2. Schechter CB, Near AM, Jayasekera J, *et al.* Structure, function, and applications of the Georgetown–Einstein (GE) breast cancer simulation model. *Medical Decision Making* 2018;38(1\_suppl):66S-77S.
3. Alagoz O, Ergun MA, Cevik M, *et al.* The University of Wisconsin breast cancer epidemiology simulation model: an update. *Medical decision making* 2018;38(1\_suppl):99S-111S.
4. Alagoz O, Berry DA, de Koning HJ, *et al.* Introduction to the Cancer Intervention and Surveillance Modeling Network (CISNET) breast cancer models. *Medical Decision Making* 2018;38(1\_suppl):3S-8S.
5. Mandelblatt JS, Near AM, Miglioretti DL, *et al.* Common model inputs used in CISNET collaborative breast cancer modeling. *Medical Decision Making* 2018;38(1\_suppl):9S-23S.
6. Mandelblatt JS, Stout NK, Schechter CB, *et al.* Collaborative modeling of the benefits and harms associated with different US breast cancer screening strategies. *Annals of Internal Medicine* 2016;164(4):215-225.
7. Trentham-Dietz A, Kerlikowske K, Stout NK, *et al.* Tailoring breast cancer screening intervals by breast density and risk for women aged 50 years or older: collaborative modeling of screening outcomes. *Annals of Internal Medicine* 2016;165(10):700-712.
8. Lehman CD, Arao RF, Sprague BL, *et al.* National Performance Benchmarks for Modern Screening Digital Mammography: Update from the Breast Cancer Surveillance Consortium. *Radiology* 2017;283(1):49-58.
9. Breast Cancer Surveillance Consortium. *About the BCSC*. <https://www.bcsc-research.org/about>.
10. Caswell-Jin JL, Plevritis SK, Tian L, *et al.* Change in Survival in Metastatic Breast Cancer with Treatment Advances: Meta-Analysis and Systematic Review. *JNCI Cancer Spectr* 2018;2(4):pky062.
11. Early Breast Cancer Trialists' Collaborative G, Darby S, McGale P, *et al.* Effect of radiotherapy after breast-conserving surgery on 10-year recurrence and 15-year breast cancer death: meta-analysis of individual patient data for 10,801 women in 17 randomised trials. *Lancet* 2011;378(9804):1707-16.
12. Early Breast Cancer Trialists' Collaborative G, Davies C, Godwin J, *et al.* Relevance of breast cancer hormone receptors and other factors to the efficacy of adjuvant tamoxifen: patient-level meta-analysis of randomised trials. *Lancet* 2011;378(9793):771-84.
13. Early Breast Cancer Trialists' Collaborative G, Peto R, Davies C, *et al.* Comparisons between different polychemotherapy regimens for early breast cancer: meta-analyses of long-term outcome among 100,000 women in 123 randomised trials. *Lancet* 2012;379(9814):432-44.
14. Early Breast Cancer Trialists' Collaborative Group. Effects of chemotherapy and hormonal therapy for early breast cancer on recurrence and 15-year survival: an overview of the randomised trials. *The Lancet* 2005;365(9472):1687-1717.
15. Early Breast Cancer Trialists' Collaborative Group. Aromatase inhibitors versus tamoxifen in early breast cancer: patient-level meta-analysis of the randomised trials. *Lancet* 2015;386(10001):1341-1352.

16. Early Breast Cancer Trialists' Collaborative Group. Long-term outcomes for neoadjuvant versus adjuvant chemotherapy in early breast cancer: meta-analysis of individual patient data from ten randomised trials. *Lancet Oncol* 2018;19(1):27-39.
17. Gangnon RE, Stout NK, Alagoz O, *et al.* Contribution of breast cancer to overall mortality for US women. *Medical Decision Making* 2018;38(1\_suppl):24S-31S.
18. Cronin KA, Mariotto AB, Clarke LD, *et al.* Additional common inputs for analyzing impact of adjuvant therapy and mammography on US mortality. *Journal of the National Cancer Institute. Monographs* 2005, (36):26-29.
19. Cronin KA, Yu B, Krapcho M, *et al.* Modeling the dissemination of mammography in the United States. *Cancer Causes & Control* 2005;16(6):701-712.
20. EPIC Health Research Network. *Delayed cancer screenings--A Second Look*. <https://ehrn.org/articles/delayed-cancer-screenings-a-second-look>.
21. Ahmad FB, Cisewski JA, Miniño A, *et al.* Provisional Mortality Data — United States, 2020. *MMWR MorbMortal Wkly Rep* 2021;70:519–522. DOI: <http://dx.doi.org/10.15585/mmwr.mm7014e1>.

## Supplementary Tables

Supplementary Table 1: Summary of key model features (Adopted from previous publications [5-7])<sup>a</sup>

| Feature                                            | Model                                           |                                                  |                                                                 |
|----------------------------------------------------|-------------------------------------------------|--------------------------------------------------|-----------------------------------------------------------------|
|                                                    | model D<br>(Dana-Farber)                        | model G-E<br>(Georgetown-<br>Albert Einstein)    | model W-H<br>(Wisconsin-Harvard)                                |
| Type                                               | Analytical                                      | Simulation                                       | Simulation                                                      |
| Natural history of breast cancer                   | State transition                                | State transition                                 | Continuous tumor growth with some indolent and aggressive cases |
| Method of construction                             | Stochastic process, State transition            | Time to event                                    | Longitudinal, Stochastic process, State transition              |
| Includes DCIS                                      | Yes                                             | Yes                                              | Yes                                                             |
| Includes ER, HER2                                  | Yes                                             | Yes                                              | Yes                                                             |
| SEER breast cancer data used for model calibration | Incidence                                       | Incidence                                        | Incidence and mortality                                         |
| Screening benefit mechanism                        | Stage shift                                     | Stage shift, age shift                           | Smaller tumor size, age shift                                   |
| Treatment benefit mechanism                        | Hazard reduction                                | Hazard reduction                                 | Cure fraction                                                   |
| Factors affecting treatment benefit                | ER and HER2; age; year of and size at diagnosis | ER and HER2; age; year of and stage at diagnosis | ER and HER2; age; year of and stage at diagnosis                |

<sup>a</sup> Abbreviations: DCIS: Ductal carcinoma in situ; ER: estrogen receptor; HER2: human epidermal growth factor receptor 2; SEER: Surveillance, Epidemiology, and End Results

Supplementary Table 2. The distribution of chemotherapy use with and without pandemic for ER+/HER2- tumors by age group and stage

| Age, y | Stage | No pandemic effect |              |                   | Pandemic effect |              |                   |
|--------|-------|--------------------|--------------|-------------------|-----------------|--------------|-------------------|
|        |       | NONE               | Chemotherapy | Endocrine therapy | NONE            | Chemotherapy | Endocrine therapy |
| <50    | I     | 7.02%              | 35.35%       | 90.92%            | 7.54%           | 26.51%       | 90.92%            |
| <50    | IIa   | 3.94%              | 63.80%       | 93.19%            | 4.66%           | 47.85%       | 93.19%            |
| 50-69  | I     | 6.96%              | 19.95%       | 91.76%            | 7.28%           | 14.96%       | 91.76%            |
| 50-69  | IIa   | 1.64%              | 49.18%       | 94.45%            | 2.62%           | 36.89%       | 94.45%            |
| 70+    | I     | 16.27%             | 4.87%        | 83.57%            | 16.35%          | 2.44%        | 83.57%            |
| 70+    | IIa   | 10.40%             | 14.40%       | 86.40%            | 12.00%          | 7.20%        | 86.40%            |

Supplementary Table 3. Base-case age-adjusted mortality rates (Ages 30-84) for all scenarios in each year (model W-H only)<sup>a</sup>

| Year | No pandemic | Delayed screening | Skipped screening | Hybrid delayed/ skipped screening | Delayed diagnosis | Reduced chemo treatment | Delayed screening & Delayed diagnosis | Skipped screening & Delayed diagnosis | Hybrid delayed/ skipped screening & Delayed diagnosis | Delayed screening & Delayed diagnosis & Reduced chemo treatment | Skipped screening & Delayed diagnosis & Reduced chemo treatment | Hybrid delayed/ skipped screening & Delayed diagnosis & Reduced chemo treatment |
|------|-------------|-------------------|-------------------|-----------------------------------|-------------------|-------------------------|---------------------------------------|---------------------------------------|-------------------------------------------------------|-----------------------------------------------------------------|-----------------------------------------------------------------|---------------------------------------------------------------------------------|
| 2020 | 30.91       | 30.98             | 31.06             | 31.02                             | 31.08             | 30.91                   | 31.17                                 | 31.24                                 | 31.20                                                 | 31.17                                                           | 31.24                                                           | 31.20                                                                           |
| 2021 | 31.12       | 31.17             | 31.28             | 31.23                             | 31.41             | 31.13                   | 31.51                                 | 31.62                                 | 31.56                                                 | 31.52                                                           | 31.63                                                           | 31.57                                                                           |
| 2022 | 31.12       | 31.14             | 31.28             | 31.21                             | 31.39             | 31.17                   | 31.44                                 | 31.58                                 | 31.51                                                 | 31.48                                                           | 31.62                                                           | 31.55                                                                           |
| 2023 | 31.12       | 31.12             | 31.20             | 31.16                             | 31.28             | 31.13                   | 31.29                                 | 31.37                                 | 31.33                                                 | 31.30                                                           | 31.39                                                           | 31.34                                                                           |
| 2024 | 31.44       | 31.48             | 31.61             | 31.54                             | 31.56             | 31.46                   | 31.60                                 | 31.74                                 | 31.67                                                 | 31.62                                                           | 31.76                                                           | 31.69                                                                           |
| 2025 | 31.63       | 31.69             | 31.74             | 31.71                             | 31.68             | 31.63                   | 31.76                                 | 31.81                                 | 31.78                                                 | 31.76                                                           | 31.81                                                           | 31.79                                                                           |
| 2026 | 32.03       | 32.14             | 32.20             | 32.17                             | 32.09             | 32.04                   | 32.20                                 | 32.26                                 | 32.23                                                 | 32.21                                                           | 32.27                                                           | 32.24                                                                           |
| 2027 | 32.11       | 32.07             | 32.18             | 32.12                             | 32.12             | 32.11                   | 32.10                                 | 32.21                                 | 32.15                                                 | 32.10                                                           | 32.21                                                           | 32.15                                                                           |
| 2028 | 32.05       | 32.12             | 32.11             | 32.12                             | 32.05             | 32.05                   | 32.13                                 | 32.12                                 | 32.12                                                 | 32.13                                                           | 32.12                                                           | 32.12                                                                           |
| 2029 | 31.72       | 31.70             | 31.77             | 31.74                             | 31.73             | 31.72                   | 31.71                                 | 31.78                                 | 31.75                                                 | 31.71                                                           | 31.78                                                           | 31.75                                                                           |
| 2030 | 32.60       | 32.61             | 32.53             | 32.57                             | 32.61             | 32.60                   | 32.62                                 | 32.54                                 | 32.58                                                 | 32.62                                                           | 32.54                                                           | 32.58                                                                           |

<sup>a</sup> chemo = chemotherapy



Supplementary Table 4. Base-case raw number of breast cancer deaths (Ages 30-84) for all scenarios in each year (model W-H only)<sup>a</sup>

| Year | No pandemic | Delayed screening | Skipped screening | Hybrid delayed/skipped screening | Delayed diagnosis | Reduced chemo treatment | Delayed screening & Delayed diagnosis | Skipped screening & Delayed diagnosis | Hybrid delayed/skipped screening & Delayed diagnosis | Delayed screening & Delayed diagnosis & Reduced chemo treatment | Skipped screening & Delayed diagnosis & Reduced chemo treatment | Hybrid delayed/skipped screening & Delayed diagnosis & Reduced chemo treatment |
|------|-------------|-------------------|-------------------|----------------------------------|-------------------|-------------------------|---------------------------------------|---------------------------------------|------------------------------------------------------|-----------------------------------------------------------------|-----------------------------------------------------------------|--------------------------------------------------------------------------------|
| 2020 | 35,812      | 35,880            | 35,967            | 35,923                           | 36,000            | 35,812                  | 36,091                                | 36,178                                | 36,134                                               | 36,091                                                          | 36,178                                                          | 36,134                                                                         |
| 2021 | 36,851      | 36,910            | 37,049            | 36,979                           | 37,192            | 36,870                  | 37,302                                | 37,440                                | 37,371                                               | 37,314                                                          | 37,452                                                          | 37,383                                                                         |
| 2022 | 37,742      | 37,781            | 37,935            | 37,858                           | 38,044            | 37,811                  | 38,113                                | 38,267                                | 38,190                                               | 38,171                                                          | 38,325                                                          | 38,248                                                                         |
| 2023 | 38,277      | 38,269            | 38,356            | 38,313                           | 38,467            | 38,288                  | 38,471                                | 38,558                                | 38,514                                               | 38,482                                                          | 38,570                                                          | 38,526                                                                         |
| 2024 | 39,432      | 39,489            | 39,673            | 39,581                           | 39,576            | 39,449                  | 39,645                                | 39,828                                | 39,737                                               | 39,662                                                          | 39,845                                                          | 39,754                                                                         |
| 2025 | 40,471      | 40,550            | 40,639            | 40,595                           | 40,530            | 40,477                  | 40,638                                | 40,726                                | 40,682                                               | 40,643                                                          | 40,732                                                          | 40,688                                                                         |
| 2026 | 41,526      | 41,668            | 41,747            | 41,707                           | 41,591            | 41,538                  | 41,738                                | 41,818                                | 41,778                                               | 41,750                                                          | 41,829                                                          | 41,790                                                                         |
| 2027 | 42,718      | 42,625            | 42,803            | 42,714                           | 42,730            | 42,724                  | 42,654                                | 42,833                                | 42,744                                               | 42,660                                                          | 42,839                                                          | 42,750                                                                         |
| 2028 | 43,079      | 43,161            | 43,160            | 43,161                           | 43,086            | 43,079                  | 43,167                                | 43,167                                | 43,167                                               | 43,167                                                          | 43,167                                                          | 43,167                                                                         |
| 2029 | 43,196      | 43,139            | 43,249            | 43,194                           | 43,208            | 43,202                  | 43,151                                | 43,261                                | 43,206                                               | 43,151                                                          | 43,261                                                          | 43,206                                                                         |
| 2030 | 45,248      | 45,243            | 45,131            | 45,187                           | 45,254            | 45,248                  | 45,250                                | 45,137                                | 45,193                                               | 45,250                                                          | 45,137                                                          | 45,194                                                                         |

<sup>a</sup> chemo = chemotherapy

Supplementary Table 5. Base-case raw number of cumulative breast cancer deaths (Ages 30-84) for all scenarios in each year (model W-H only)<sup>a</sup>

| Year | No pandemic | Delayed screening | Skipped screening | Hybrid delayed/ skipped screening | Delayed diagnosis | Reduced chemo treatment | Delayed screening & Delayed diagnosis | Skipped screening & Delayed diagnosis | Hybrid delayed/ skipped screening & Delayed diagnosis | Delayed screening & Delayed diagnosis & Reduced chemo treatment | Skipped screening & Delayed diagnosis & Reduced chemo treatment | Hybrid delayed/ skipped screening & Delayed diagnosis & Reduced chemo treatment |
|------|-------------|-------------------|-------------------|-----------------------------------|-------------------|-------------------------|---------------------------------------|---------------------------------------|-------------------------------------------------------|-----------------------------------------------------------------|-----------------------------------------------------------------|---------------------------------------------------------------------------------|
| 2020 | 35,812      | 35,880            | 35,967            | 35,923                            | 36,000            | 35,812                  | 36,091                                | 36,178                                | 36,134                                                | 36,091                                                          | 36,178                                                          | 36,134                                                                          |
| 2021 | 72,664      | 72,790            | 73,015            | 72,903                            | 73,191            | 72,682                  | 73,393                                | 73,617                                | 73,505                                                | 73,405                                                          | 73,629                                                          | 73,517                                                                          |
| 2022 | 110,406     | 110,571           | 110,950           | 110,761                           | 111,236           | 110,493                 | 111,506                               | 111,884                               | 111,695                                               | 111,576                                                         | 111,955                                                         | 111,765                                                                         |
| 2023 | 148,682     | 148,840           | 149,307           | 149,073                           | 149,703           | 148,781                 | 149,976                               | 150,443                               | 150,210                                               | 150,058                                                         | 150,524                                                         | 150,291                                                                         |
| 2024 | 188,114     | 188,329           | 188,979           | 188,654                           | 189,279           | 188,230                 | 189,621                               | 190,271                               | 189,946                                               | 189,720                                                         | 190,370                                                         | 190,045                                                                         |
| 2025 | 228,585     | 228,880           | 229,618           | 229,249                           | 229,809           | 228,707                 | 230,259                               | 230,998                               | 230,628                                               | 230,363                                                         | 231,102                                                         | 230,732                                                                         |
| 2026 | 270,111     | 270,547           | 271,366           | 270,957                           | 271,400           | 270,245                 | 271,997                               | 272,815                               | 272,406                                               | 272,113                                                         | 272,931                                                         | 272,522                                                                         |
| 2027 | 312,829     | 313,172           | 314,169           | 313,671                           | 314,129           | 312,969                 | 314,652                               | 315,648                               | 315,150                                               | 314,773                                                         | 315,770                                                         | 315,272                                                                         |
| 2028 | 355,908     | 356,333           | 357,329           | 356,831                           | 357,215           | 356,048                 | 357,819                               | 358,815                               | 358,317                                               | 357,941                                                         | 358,937                                                         | 358,439                                                                         |
| 2029 | 399,104     | 399,472           | 400,578           | 400,025                           | 400,423           | 399,250                 | 400,970                               | 402,076                               | 401,523                                               | 401,092                                                         | 402,198                                                         | 401,645                                                                         |
| 2030 | 444,352     | 444,716           | 445,709           | 445,212                           | 445,677           | 444,497                 | 446,220                               | 447,213                               | 446,717                                               | 446,342                                                         | 447,335                                                         | 446,838                                                                         |

<sup>a</sup> chemo = chemotherapy

Supplementary Table 6. Base-case excess number of cumulative breast cancer deaths compared to Scenario 1 (Ages 30-84) for all scenarios in each year (model W-H only)<sup>a</sup>

| Year | Delayed screening | Skipped screening | Hybrid delayed/ skipped screening | Delayed diagnosis | Reduced chemo treatment | Delayed screening & Delayed diagnosis | Skipped screening & Delayed diagnosis | Hybrid delayed/ skipped screening & Delayed diagnosis | Delayed screening & Delayed diagnosis & Reduced chemo treatment | Skipped screening & Delayed diagnosis & Reduced chemo treatment | Hybrid delayed/ skipped screening & Delayed diagnosis & Reduced chemo treatment |
|------|-------------------|-------------------|-----------------------------------|-------------------|-------------------------|---------------------------------------|---------------------------------------|-------------------------------------------------------|-----------------------------------------------------------------|-----------------------------------------------------------------|---------------------------------------------------------------------------------|
| 2020 | 68                | 154               | 111                               | 187               | 0                       | 279                                   | 365                                   | 322                                                   | 279                                                             | 365                                                             | 322                                                                             |
| 2021 | 127               | 351               | 239                               | 528               | 18                      | 729                                   | 954                                   | 841                                                   | 741                                                             | 966                                                             | 853                                                                             |
| 2022 | 166               | 545               | 355                               | 830               | 88                      | 1,100                                 | 1,479                                 | 1,289                                                 | 1,170                                                           | 1,549                                                           | 1,360                                                                           |
| 2023 | 158               | 624               | 391                               | 1,021             | 99                      | 1,294                                 | 1,761                                 | 1,527                                                 | 1,375                                                           | 1,842                                                           | 1,609                                                                           |
| 2024 | 215               | 865               | 540                               | 1,165             | 116                     | 1,507                                 | 2,157                                 | 1,832                                                 | 1,606                                                           | 2,256                                                           | 1,931                                                                           |
| 2025 | 294               | 1,033             | 664                               | 1,223             | 122                     | 1,674                                 | 2,412                                 | 2,043                                                 | 1,778                                                           | 2,516                                                           | 2,147                                                                           |
| 2026 | 436               | 1,254             | 845                               | 1,288             | 133                     | 1,886                                 | 2,704                                 | 2,295                                                 | 2,001                                                           | 2,820                                                           | 2,410                                                                           |
| 2027 | 343               | 1,340             | 842                               | 1,300             | 140                     | 1,822                                 | 2,819                                 | 2,321                                                 | 1,944                                                           | 2,941                                                           | 2,443                                                                           |
| 2028 | 425               | 1,421             | 923                               | 1,307             | 140                     | 1,910                                 | 2,907                                 | 2,409                                                 | 2,032                                                           | 3,029                                                           | 2,531                                                                           |
| 2029 | 368               | 1,474             | 921                               | 1,319             | 146                     | 1,866                                 | 2,972                                 | 2,419                                                 | 1,988                                                           | 3,094                                                           | 2,541                                                                           |
| 2030 | 364               | 1,357             | 860                               | 1,325             | 146                     | 1,868                                 | 2,861                                 | 2,365                                                 | 1,990                                                           | 2,983                                                           | 2,487                                                                           |

<sup>a</sup> chemo = chemotherapy

Supplementary Table 7. Base-case % increase in excess number of cumulative breast cancer deaths compared to Scenario 1 (Ages 30-84) for all scenarios in each year (model W-H only)<sup>a</sup>

| Year | Delayed screening | Skipped screening | Hybrid delayed/ skipped screening | Delayed diagnosis | Reduced chemo treatment | Delayed screening & Delayed diagnosis | Skipped screening & Delayed diagnosis | Hybrid delayed/ skipped screening & Delayed diagnosis | Delayed screening & Delayed diagnosis & Reduced chemo treatment | Skipped screening & Delayed diagnosis & Reduced chemo treatment | Hybrid delayed/ skipped screening & Delayed diagnosis & Reduced chemo treatment |
|------|-------------------|-------------------|-----------------------------------|-------------------|-------------------------|---------------------------------------|---------------------------------------|-------------------------------------------------------|-----------------------------------------------------------------|-----------------------------------------------------------------|---------------------------------------------------------------------------------|
| 2020 | 0.19%             | 0.43%             | 0.31%                             | 0.52%             | 0.00%                   | 0.78%                                 | 1.02%                                 | 0.90%                                                 | 0.78%                                                           | 1.02%                                                           | 0.90%                                                                           |
| 2021 | 0.17%             | 0.48%             | 0.33%                             | 0.73%             | 0.02%                   | 1.00%                                 | 1.31%                                 | 1.16%                                                 | 1.02%                                                           | 1.33%                                                           | 1.17%                                                                           |
| 2022 | 0.15%             | 0.49%             | 0.32%                             | 0.75%             | 0.08%                   | 1.00%                                 | 1.34%                                 | 1.17%                                                 | 1.06%                                                           | 1.40%                                                           | 1.23%                                                                           |
| 2023 | 0.11%             | 0.42%             | 0.26%                             | 0.69%             | 0.07%                   | 0.87%                                 | 1.18%                                 | 1.03%                                                 | 0.93%                                                           | 1.24%                                                           | 1.08%                                                                           |
| 2024 | 0.11%             | 0.46%             | 0.29%                             | 0.62%             | 0.06%                   | 0.80%                                 | 1.15%                                 | 0.97%                                                 | 0.85%                                                           | 1.20%                                                           | 1.03%                                                                           |
| 2025 | 0.13%             | 0.45%             | 0.29%                             | 0.54%             | 0.05%                   | 0.73%                                 | 1.06%                                 | 0.89%                                                 | 0.78%                                                           | 1.10%                                                           | 0.94%                                                                           |
| 2026 | 0.16%             | 0.46%             | 0.31%                             | 0.48%             | 0.05%                   | 0.70%                                 | 1.00%                                 | 0.85%                                                 | 0.74%                                                           | 1.04%                                                           | 0.89%                                                                           |
| 2027 | 0.11%             | 0.43%             | 0.27%                             | 0.42%             | 0.04%                   | 0.58%                                 | 0.90%                                 | 0.74%                                                 | 0.62%                                                           | 0.94%                                                           | 0.78%                                                                           |
| 2028 | 0.12%             | 0.40%             | 0.26%                             | 0.37%             | 0.04%                   | 0.54%                                 | 0.82%                                 | 0.68%                                                 | 0.57%                                                           | 0.85%                                                           | 0.71%                                                                           |
| 2029 | 0.09%             | 0.37%             | 0.23%                             | 0.33%             | 0.04%                   | 0.47%                                 | 0.74%                                 | 0.61%                                                 | 0.50%                                                           | 0.78%                                                           | 0.64%                                                                           |
| 2030 | 0.08%             | 0.31%             | 0.19%                             | 0.30%             | 0.03%                   | 0.42%                                 | 0.64%                                 | 0.53%                                                 | 0.45%                                                           | 0.67%                                                           | 0.56%                                                                           |

<sup>a</sup> chemo = chemotherapy

Supplementary Table 8. Sensitivity analysis on the proportion of patients who reschedule their missed screening mammograms in 6 months<sup>a</sup>

| Scenario                                                           | 2022                                           |            | 2025                                               |            | 2030                                                           |            |
|--------------------------------------------------------------------|------------------------------------------------|------------|----------------------------------------------------|------------|----------------------------------------------------------------|------------|
| Scenario 1: No COVID-19 impact, median cumulative number of deaths | 122,675                                        |            | 250,633                                            |            | 473,903                                                        |            |
|                                                                    | Hybrid delayed/skipped screening (Scenario 2c) |            | Disruptions in screening & diagnosis (Scenario 5c) |            | Disruptions in screening & diagnosis & treatment (Scenario 6c) |            |
| % of women who reschedule their missed mammograms in 6 months      | Excess number of deaths                        | % increase | Excess number of deaths                            | % increase | Excess number of deaths                                        | % increase |
| 0%                                                                 | 1,357                                          | 0.31%      | 2,329                                              | 0.52%      | 2,983                                                          | 0.67%      |
| 10%                                                                | 1,258                                          | 0.28%      | 2,230                                              | 0.50%      | 2,884                                                          | 0.65%      |
| 20%                                                                | 1,158                                          | 0.26%      | 2,130                                              | 0.48%      | 2,785                                                          | 0.63%      |
| 30%                                                                | 1,059                                          | 0.24%      | 2,031                                              | 0.46%      | 2,685                                                          | 0.60%      |
| 40%                                                                | 960                                            | 0.22%      | 1,932                                              | 0.43%      | 2,586                                                          | 0.58%      |
| 50%                                                                | 860                                            | 0.19%      | 1,832                                              | 0.41%      | 2,487                                                          | 0.56%      |
| 60%                                                                | 761                                            | 0.17%      | 1,733                                              | 0.39%      | 2,387                                                          | 0.54%      |
| 70%                                                                | 662                                            | 0.15%      | 1,634                                              | 0.37%      | 2,288                                                          | 0.51%      |
| 80%                                                                | 562                                            | 0.13%      | 1,535                                              | 0.35%      | 2,189                                                          | 0.49%      |
| 90%                                                                | 463                                            | 0.10%      | 1,435                                              | 0.32%      | 2,089                                                          | 0.47%      |
| 100%                                                               | 364                                            | 0.08%      | 1,336                                              | 0.30%      | 1,990                                                          | 0.45%      |

<sup>a</sup> This tables presents median cumulative excess breast cancer mortality by 2022, 2025, and 2030 due to the COVID-19 pandemic effect for selected scenarios across the three models. The excess mortality is expressed in terms of both the number of breast cancer deaths and % increase compared to cumulative number of breast cancer deaths without pandemic effect

Supplementary Table 9. Sensitivity analysis on the rate of reduction in screening rates (reduced screening is 25% compared to 50% for the base case)<sup>a</sup>

| Scenario                                                       | 2022                    |            | 2025                    |            | 2030                    |            |
|----------------------------------------------------------------|-------------------------|------------|-------------------------|------------|-------------------------|------------|
| Scenario 1: No COVID-19 impact, cumulative number of deaths    | 110,406                 |            | 228,585                 |            | 473,903                 |            |
|                                                                | Excess number of deaths | % increase | Excess number of deaths | % increase | Excess number of deaths | % increase |
| Delayed screening (Scenario 2a)                                | 118                     | 0.11%      | 221                     | 0.10%      | 293                     | 0.07%      |
| Skipped screening (Scenario 2b)                                | 257                     | 0.23%      | 551                     | 0.24%      | 714                     | 0.16%      |
| Hybrid delayed/skipped screening (Scenario 2c)                 | 187                     | 0.17%      | 386                     | 0.17%      | 504                     | 0.11%      |
| Delayed diagnosis (Scenario 3)                                 | 830                     | 0.75%      | 1,223                   | 0.54%      | 1,325                   | 0.30%      |
| Reduced chemotherapy treatment (Scenario 4)                    | 88                      | 0.08%      | 122                     | 0.05%      | 146                     | 0.03%      |
| Disruptions in screening & diagnosis (Scenario 5c)             | 503                     | 0.46%      | 769                     | 0.34%      | 861                     | 0.19%      |
| Disruptions in screening & diagnosis & treatment (Scenario 6c) | 1,157                   | 1.05%      | 1,818                   | 0.80%      | 2,067                   | 0.47%      |

<sup>a</sup> This table presents the cumulative excess breast cancer mortality due to pandemic effect by 2022, 2025, and 2030 for selected scenarios for the exemplary model. The excess mortality is expressed in terms of both the number of breast cancer deaths and % increase compared to cumulative number of breast cancer deaths without pandemic effect

Supplementary Table 10. Sensitivity analysis on the rate of reduction in screening rates (reduced screening is 75% compared to 50% for the base case)<sup>a</sup>

| Scenario                                                       | 2022                    |            | 2025                    |            | 2030                    |            |
|----------------------------------------------------------------|-------------------------|------------|-------------------------|------------|-------------------------|------------|
| Scenario 1: No COVID-19 impact, cumulative number of deaths    | 110,406                 |            | 228,585                 |            | 473,903                 |            |
|                                                                | Excess number of deaths | % increase | Excess number of deaths | % increase | Excess number of deaths | % increase |
| Delayed screening (Scenario 2a)                                | 227                     | 0.21%      | 188                     | 0.08%      | 369                     | 0.08%      |
| Skipped screening (Scenario 2b)                                | 776                     | 0.70%      | 1,520                   | 0.66%      | 1,925                   | 0.43%      |
| Hybrid delayed/skipped screening (Scenario 2c)                 | 501                     | 0.45%      | 854                     | 0.37%      | 1,147                   | 0.26%      |
| Delayed diagnosis (Scenario 3)                                 | 830                     | 0.75%      | 1,223                   | 0.54%      | 1,325                   | 0.30%      |
| Reduced chemotherapy treatment (Scenario 4)                    | 88                      | 0.08%      | 122                     | 0.05%      | 146                     | 0.03%      |
| Disruptions in screening & diagnosis (Scenario 5c)             | 609                     | 0.55%      | 833                     | 0.36%      | 992                     | 0.22%      |
| Disruptions in screening & diagnosis & treatment (Scenario 6c) | 1,545                   | 1.40%      | 2,412                   | 1.06%      | 2,860                   | 0.64%      |

<sup>a</sup> This table presents the cumulative excess breast cancer mortality due to pandemic effect by 2022, 2025, and 2030 for selected scenarios for the exemplary model. The excess mortality is expressed in terms of both the number of breast cancer deaths and % increase compared to cumulative number of breast cancer deaths without pandemic effect

Supplementary Table 11. Sensitivity analysis on the proportion of the clinical detected cases that are delayed (15% of cases are delayed compared to 25% for the base case)<sup>a</sup>

| Scenario                                                       | 2022                    |            | 2025                    |            | 2030                    |            |
|----------------------------------------------------------------|-------------------------|------------|-------------------------|------------|-------------------------|------------|
| Scenario 1: No COVID-19 impact, cumulative number of deaths    | 110,406                 |            | 228,585                 |            | 473,903                 |            |
|                                                                | Excess number of deaths | % increase | Excess number of deaths | % increase | Excess number of deaths | % increase |
| Delayed screening (Scenario 2a)                                | 166                     | 0.15%      | 294                     | 0.13%      | 364                     | 0.08%      |
| Skipped screening (Scenario 2b)                                | 545                     | 0.49%      | 1,033                   | 0.45%      | 1,357                   | 0.31%      |
| Hybrid delayed/skipped screening (Scenario 2c)                 | 355                     | 0.32%      | 664                     | 0.29%      | 860                     | 0.19%      |
| Delayed diagnosis (Scenario 3)                                 | 488                     | 0.44%      | 697                     | 0.30%      | 758                     | 0.17%      |
| Reduced chemotherapy treatment (Scenario 4)                    | 88                      | 0.08%      | 122                     | 0.05%      | 146                     | 0.03%      |
| Disruptions in screening & diagnosis (Scenario 5c)             | 900                     | 0.82%      | 1,447                   | 0.63%      | 1,711                   | 0.38%      |
| Disruptions in screening & diagnosis & treatment (Scenario 6c) | 970                     | 0.88%      | 1,551                   | 0.68%      | 1,832                   | 0.41%      |

<sup>a</sup> This table presents the cumulative excess breast cancer mortality due to pandemic effect by 2022, 2025, and 2030 for selected scenarios for the exemplary model. The excess mortality is expressed in terms of both the number of breast cancer deaths and % increase compared to cumulative number of breast cancer deaths without pandemic effect



Supplementary Table 12. Sensitivity analysis on the proportion of the clinical detected cases that are delayed (40% of cases are delayed compared to 25% for the base case)<sup>a</sup>

| Scenario                                                       | 2022                    |            | 2025                    |            | 2030                    |            |
|----------------------------------------------------------------|-------------------------|------------|-------------------------|------------|-------------------------|------------|
| Scenario 1: No COVID-19 impact, cumulative number of deaths    | 110,406                 |            | 228,585                 |            | 473,903                 |            |
|                                                                | Excess number of deaths | % increase | Excess number of deaths | % increase | Excess number of deaths | % increase |
| Delayed screening (Scenario 2a)                                | 166                     | 0.15%      | 294                     | 0.13%      | 364                     | 0.08%      |
| Skipped screening (Scenario 2b)                                | 545                     | 0.49%      | 1,033                   | 0.45%      | 1,357                   | 0.31%      |
| Hybrid delayed/skipped screening (Scenario 2c)                 | 355                     | 0.32%      | 664                     | 0.29%      | 860                     | 0.19%      |
| Delayed diagnosis (Scenario 3)                                 | 1,369                   | 1.24%      | 1,994                   | 0.87%      | 2,225                   | 0.50%      |
| Reduced chemotherapy treatment (Scenario 4)                    | 88                      | 0.08%      | 122                     | 0.05%      | 146                     | 0.03%      |
| Disruptions in screening & diagnosis (Scenario 5c)             | 837                     | 0.76%      | 1,246                   | 0.54%      | 1,417                   | 0.32%      |
| Disruptions in screening & diagnosis & treatment (Scenario 6c) | 1,646                   | 1.49%      | 2,556                   | 1.12%      | 2,969                   | 0.67%      |

<sup>a</sup> This table presents the cumulative excess breast cancer mortality due to pandemic effect by 2022, 2025, and 2030 for selected scenarios for the exemplary model. The excess mortality is expressed in terms of both the number of breast cancer deaths and % increase compared to cumulative number of breast cancer deaths without pandemic effect

Supplementary Table 13. Sensitivity analysis on the rate of reduction in chemotherapy use (12.5% of women aged<70 and 25% of women aged>70 compared to 25% of women aged<70 and 50% of women aged>70 for the base case)<sup>a</sup>

| Scenario                                                       | 2022                    |            | 2025                    |            | 2030                    |            |
|----------------------------------------------------------------|-------------------------|------------|-------------------------|------------|-------------------------|------------|
| Scenario 1: No COVID-19 impact, cumulative number of deaths    | 110,406                 |            | 228,585                 |            | 473,903                 |            |
|                                                                | Excess number of deaths | % increase | Excess number of deaths | % increase | Excess number of deaths | % increase |
| Delayed screening (Scenario 2a)                                | 166                     | 0.15%      | 294                     | 0.13%      | 364                     | 0.08%      |
| Skipped screening (Scenario 2b)                                | 545                     | 0.49%      | 1,033                   | 0.45%      | 1,357                   | 0.31%      |
| Hybrid delayed/skipped screening (Scenario 2c)                 | 355                     | 0.32%      | 664                     | 0.29%      | 860                     | 0.19%      |
| Delayed diagnosis (Scenario 3)                                 | 830                     | 0.75%      | 1,223                   | 0.54%      | 1,325                   | 0.30%      |
| Reduced chemotherapy treatment (Scenario 4)                    | 46                      | 0.04%      | 69                      | 0.03%      | 87                      | 0.02%      |
| Disruptions in screening & diagnosis (Scenario 5c)             | 1,289                   | 1.17%      | 2,043                   | 0.89%      | 2,365                   | 0.53%      |
| Disruptions in screening & diagnosis & treatment (Scenario 6c) | 1,324                   | 1.20%      | 2,100                   | 0.92%      | 2,433                   | 0.55%      |

<sup>a</sup> This table presents the cumulative excess breast cancer mortality due to pandemic effect by 2022, 2025, and 2030 for selected scenarios for the exemplary model. The excess mortality is expressed in terms of both the number of breast cancer deaths and % increase compared to cumulative number of breast cancer deaths without pandemic effect

Supplementary Table 14. Sensitivity analysis on the rate of reduction in chemotherapy use (50% of women aged<70 and 75% of women aged>70 compared to 25% of women aged<70 and 50% of women aged>70 for the base case)<sup>a</sup>

| Scenario                                                       | 2022                    |            | 2025                    |            | 2030                    |            |
|----------------------------------------------------------------|-------------------------|------------|-------------------------|------------|-------------------------|------------|
| Scenario 1: No COVID-19 impact, cumulative number of deaths    | 110,406                 |            | 228,585                 |            | 473,903                 |            |
|                                                                | Excess number of deaths | % increase | Excess number of deaths | % increase | Excess number of deaths | % increase |
| Delayed screening (Scenario 2a)                                | 166                     | 0.15%      | 294                     | 0.13%      | 364                     | 0.08%      |
| Skipped screening (Scenario 2b)                                | 545                     | 0.49%      | 1,033                   | 0.45%      | 1,357                   | 0.31%      |
| Hybrid delayed/skipped screening (Scenario 2c)                 | 355                     | 0.32%      | 664                     | 0.29%      | 860                     | 0.19%      |
| Delayed diagnosis (Scenario 3)                                 | 830                     | 0.75%      | 1,223                   | 0.54%      | 1,325                   | 0.30%      |
| Reduced chemotherapy treatment (Scenario 4)                    | 140                     | 0.13%      | 215                     | 0.09%      | 262                     | 0.06%      |
| Disruptions in screening & diagnosis (Scenario 5c)             | 1,289                   | 1.17%      | 2,043                   | 0.89%      | 2,365                   | 0.53%      |
| Disruptions in screening & diagnosis & treatment (Scenario 6c) | 1,394                   | 1.26%      | 2,217                   | 0.97%      | 2,580                   | 0.58%      |

<sup>a</sup> This table presents the cumulative excess breast cancer mortality due to pandemic effect by 2022, 2025, and 2030 for selected scenarios for the exemplary model. The excess mortality is expressed in terms of both the number of breast cancer deaths and % increase compared to cumulative number of breast cancer deaths without pandemic effect

Supplementary Table 15. Sensitivity analysis on the impact of COVID-19 on other-cause mortality<sup>a</sup>

| Scenario                                                       | 2022                    |            | 2025                    |            | 2030                    |            |
|----------------------------------------------------------------|-------------------------|------------|-------------------------|------------|-------------------------|------------|
| Scenario 1: No COVID-19 impact, cumulative number of deaths    | 110,242                 |            | 228,319                 |            | 444,058                 |            |
|                                                                | Excess number of deaths | % increase | Excess number of deaths | % increase | Excess number of deaths | % increase |
| Delayed screening (Scenario 2a)                                | 189                     | 0.17%      | 220                     | 0.10%      | 198                     | 0.04%      |
| Skipped screening (Scenario 2b)                                | 655                     | 0.59%      | 1,121                   | 0.49%      | 1,320                   | 0.30%      |
| Hybrid delayed/skipped screening (Scenario 2c)                 | 422                     | 0.38%      | 670                     | 0.29%      | 759                     | 0.17%      |
| Delayed diagnosis (Scenario 3)                                 | 837                     | 0.76%      | 1,225                   | 0.54%      | 1,327                   | 0.30%      |
| Reduced chemotherapy treatment (Scenario 4)                    | 88                      | 0.08%      | 122                     | 0.05%      | 146                     | 0.03%      |
| Disruptions in screening & diagnosis (Scenario 5c)             | 1,369                   | 1.24%      | 2,086                   | 0.91%      | 2,300                   | 0.52%      |
| Disruptions in screening & diagnosis & treatment (Scenario 6c) | 1,440                   | 1.31%      | 2,185                   | 0.96%      | 2,417                   | 0.54%      |

<sup>a</sup> This table presents the cumulative excess breast cancer mortality due to pandemic effect by 2022, 2025, and 2030 for selected scenarios for the exemplary model. The excess mortality is expressed in terms of both the number of breast cancer deaths and % increase compared to cumulative number of breast cancer deaths without pandemic effect. Scenario 1 in this table also considers a higher other-cause mortality therefore number of deaths due to breast cancer is different than that in the base case for this scenario.

## Supplementary Figures

**Supplementary Figure 1. Radiology facility mammography volume for evaluation of a breast problem during January – June 2020 at selected facilities participating in the Vermont Breast Cancer Surveillance System (VBCSS) and San Francisco Mammography Registry (SFMR).**

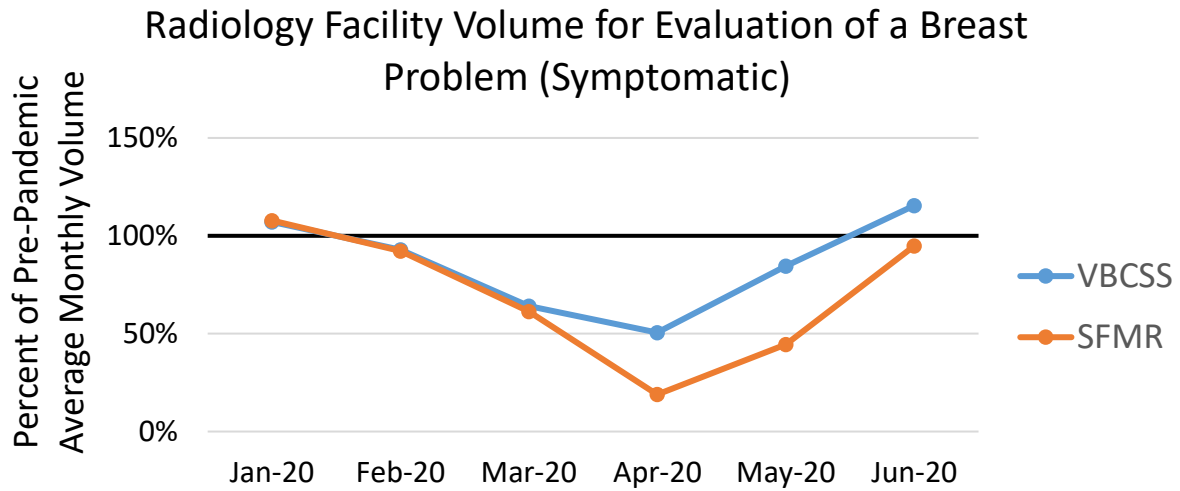

**Supplementary Figure 2. Age-adjusted (30-84 years old) mortality over time with comparison to SEER data for no pandemic scenario (Scenario 1)**

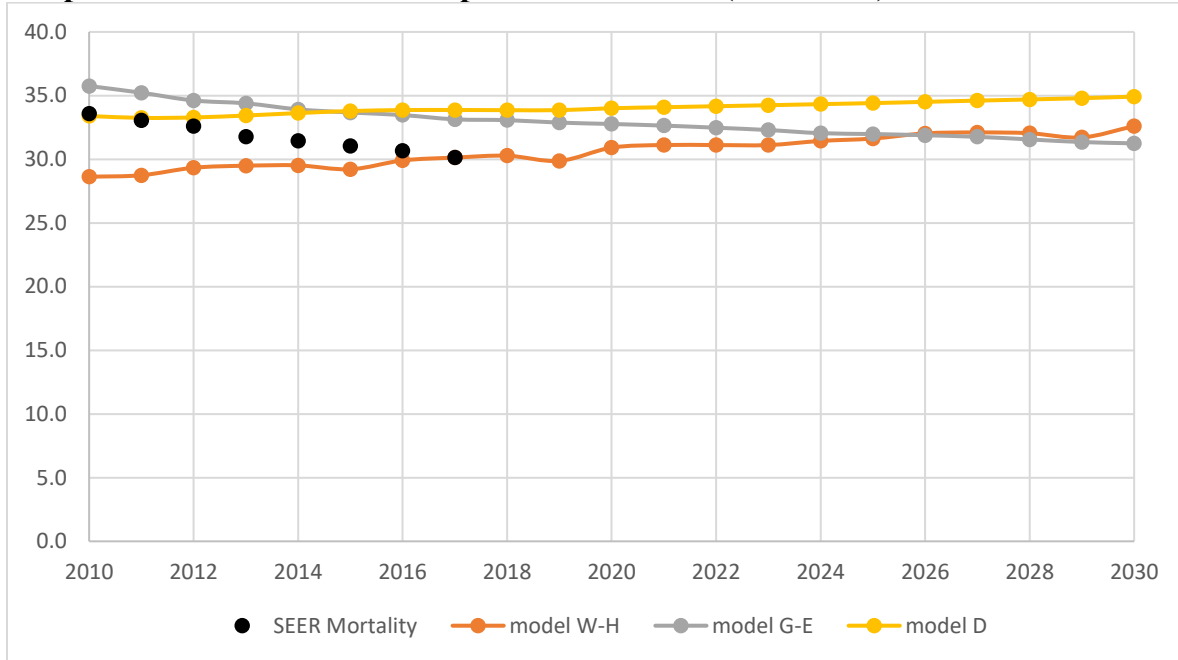

**Supplementary Figure 3. Cumulative excess breast cancer mortality according to model D over time.** Panel A presents the number of cumulative excessive deaths when each disruption is modeled separately and Panel B presents the number of excessive deaths when disruptions are combined.

A)

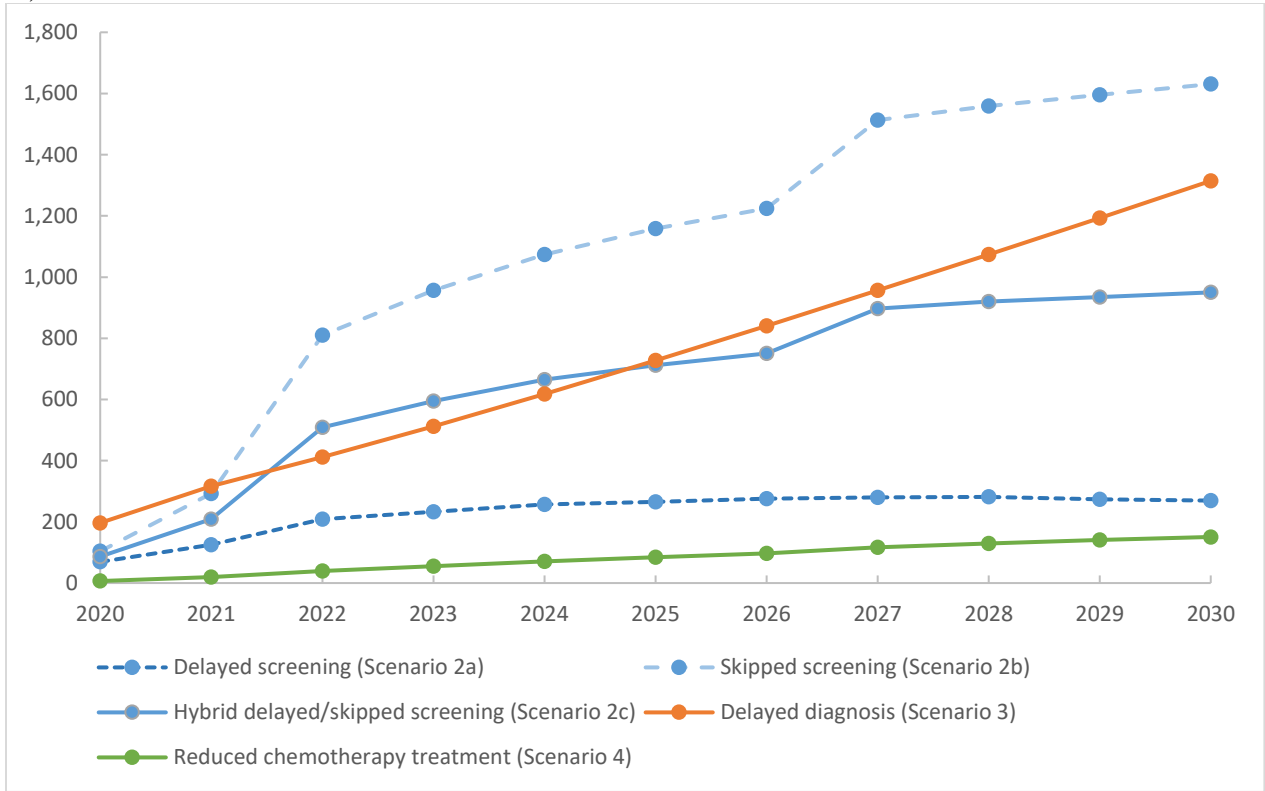

B)

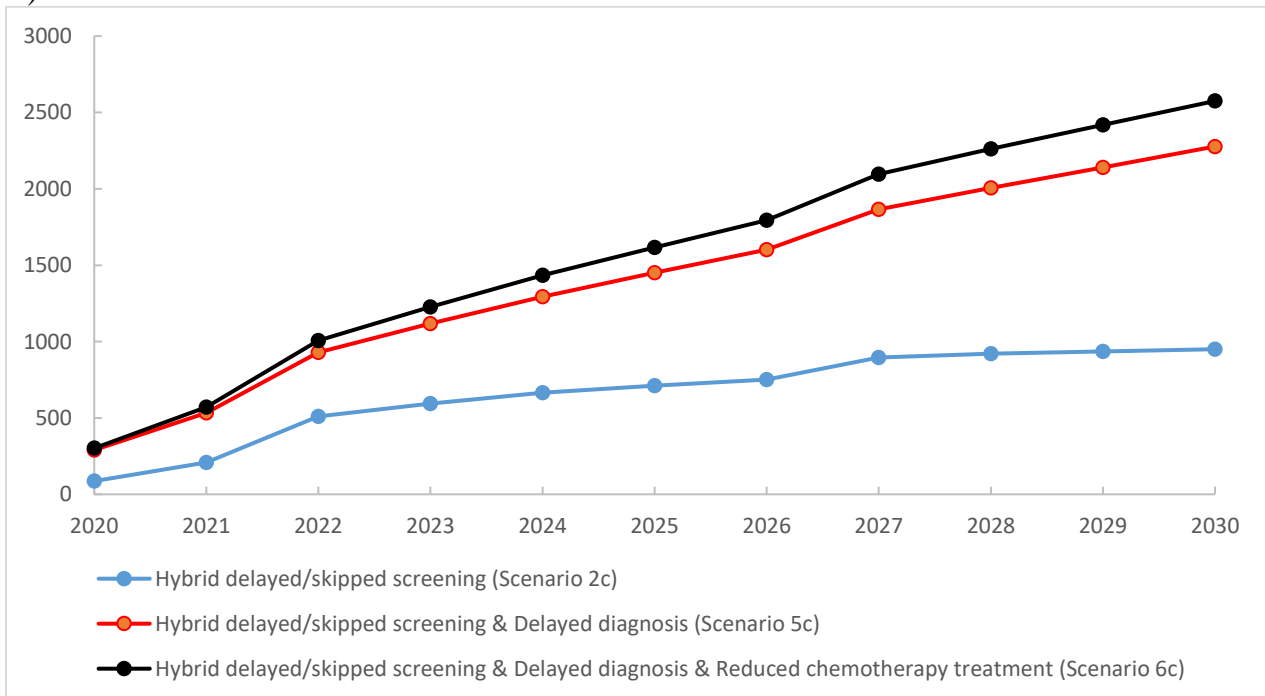

**Supplementary Figure 4. Cumulative excess breast cancer mortality according to model GE over time.** Panel A presents the number of cumulative excessive deaths when each disruption is modeled separately and Panel B presents the number of excessive deaths when disruptions are combined.

A)

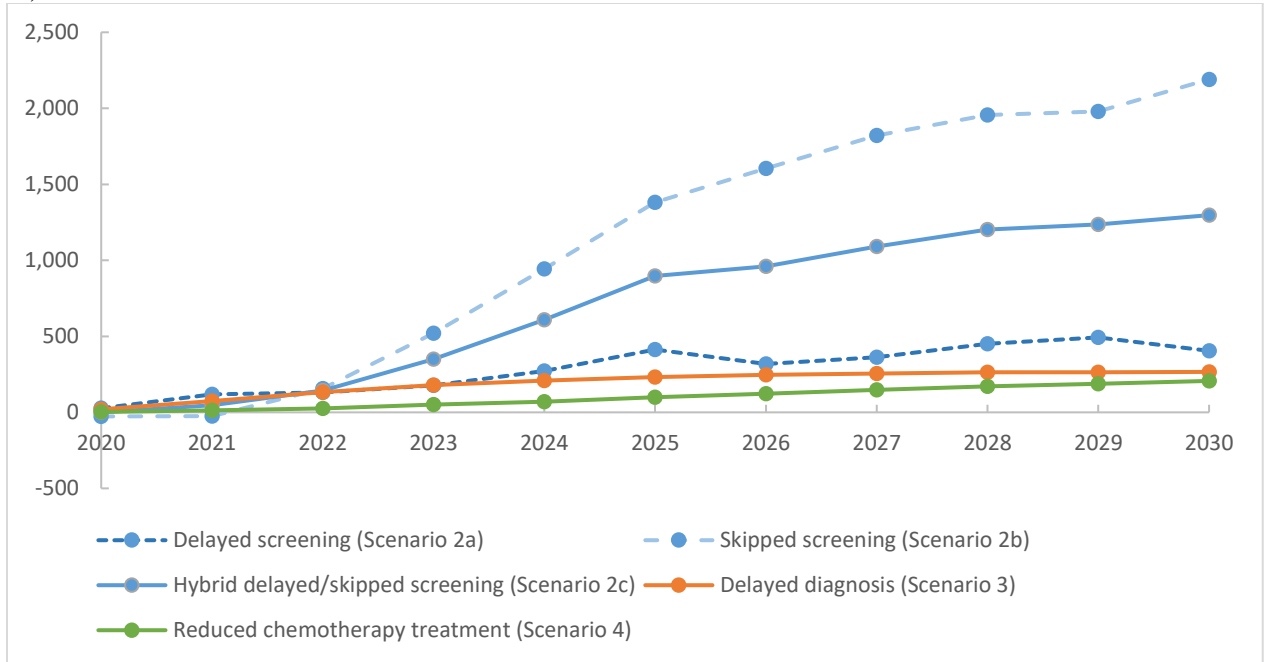

B)

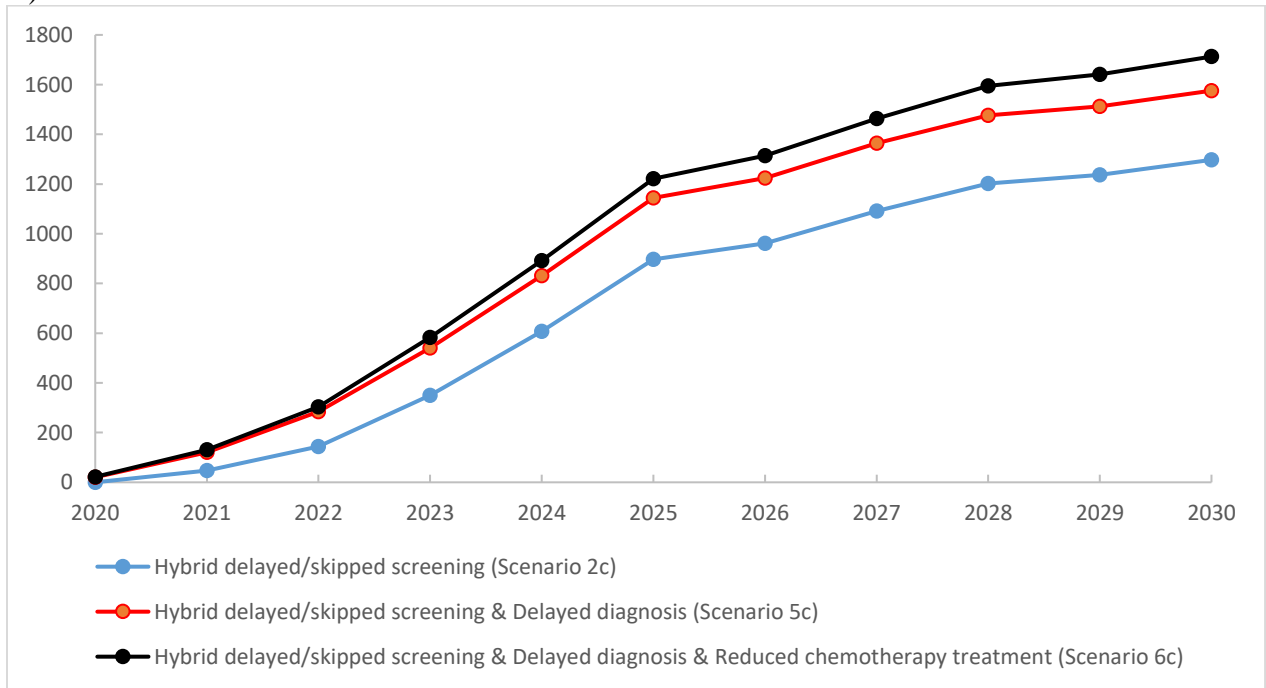



**Supplementary Figure 5. Cumulative excess breast cancer mortality according to model D over time when the pandemic-related disruptions last for 12 months.** Panel A presents the number of cumulative excessive deaths when each disruption is modeled separately and Panel B presents the number of excessive deaths when disruptions are combined.

A)

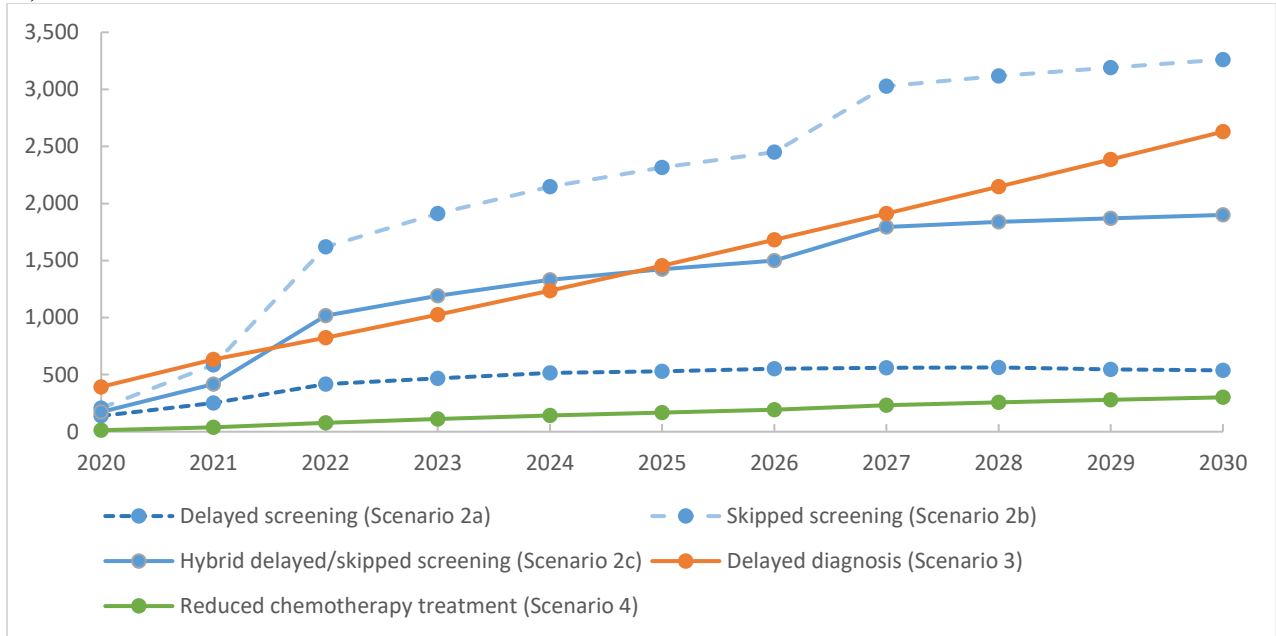

B)

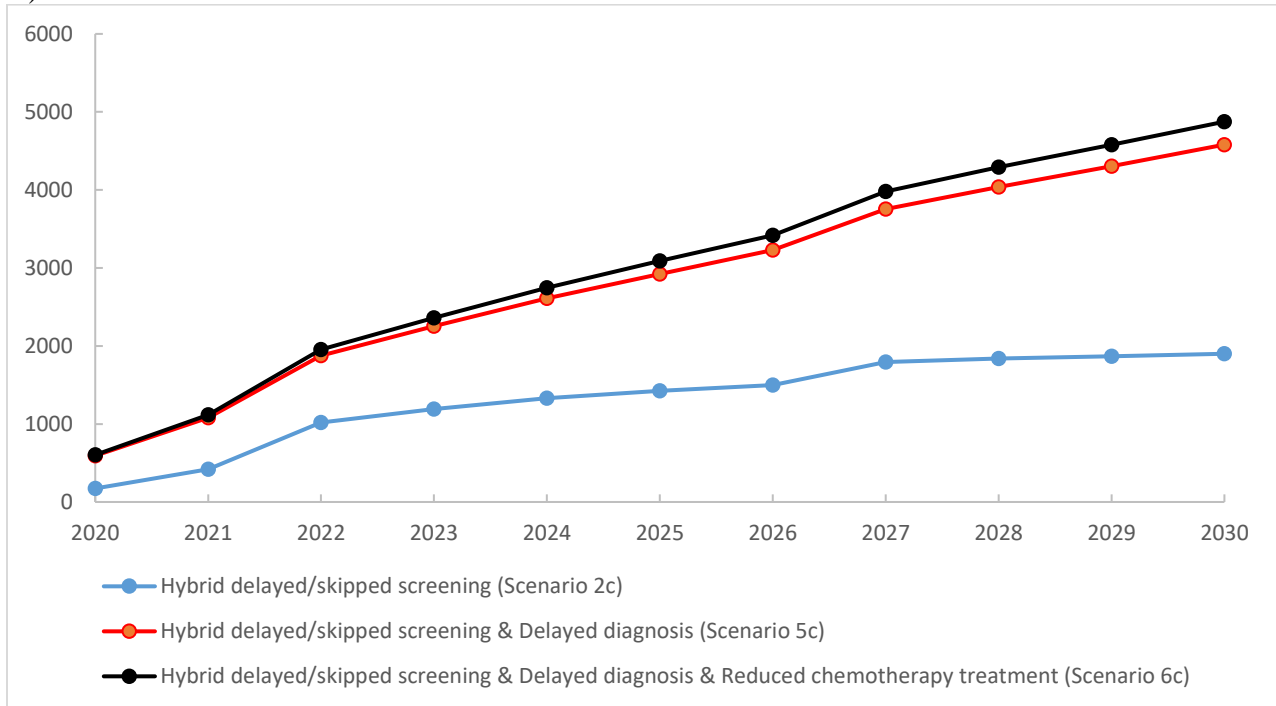

**Supplementary Figure 6. Cumulative excess breast cancer mortality according to model GE over time when the pandemic-related disruptions last for 12 months.** Panel A presents the number of cumulative excessive deaths when each disruption is modeled separately and Panel B presents the number of excessive deaths when disruptions are combined.

A)

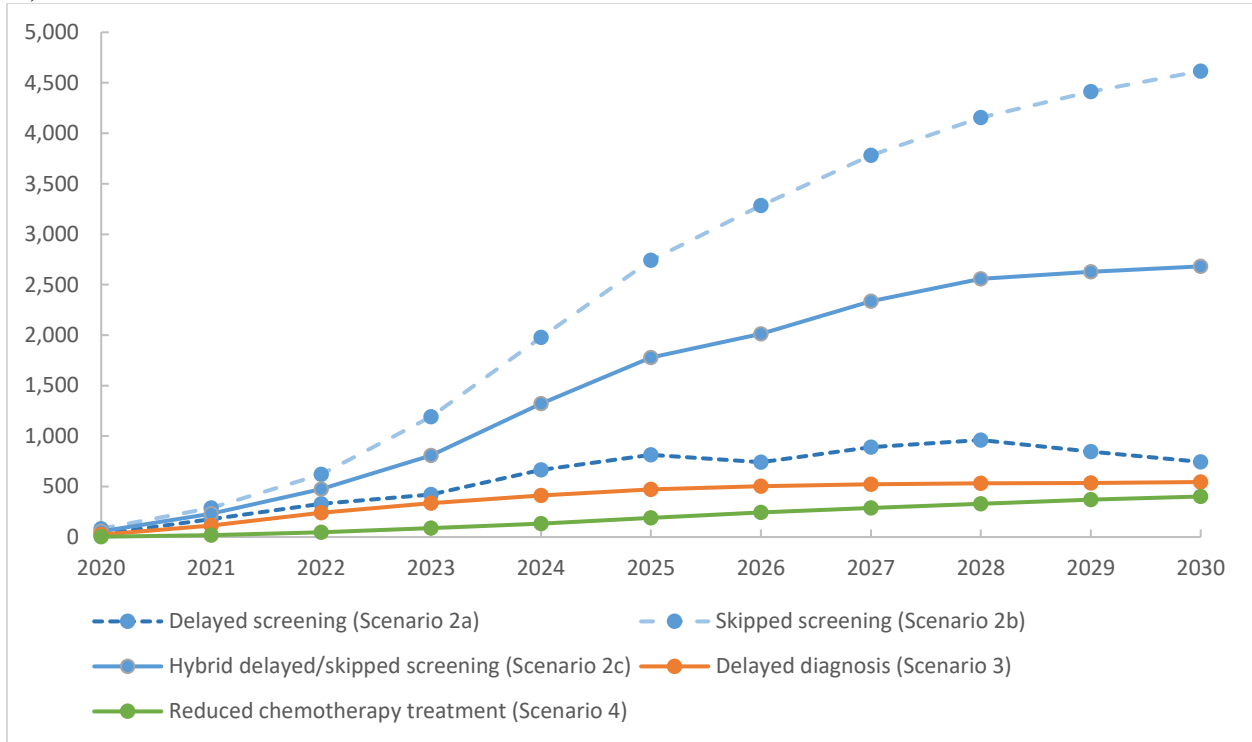

B)

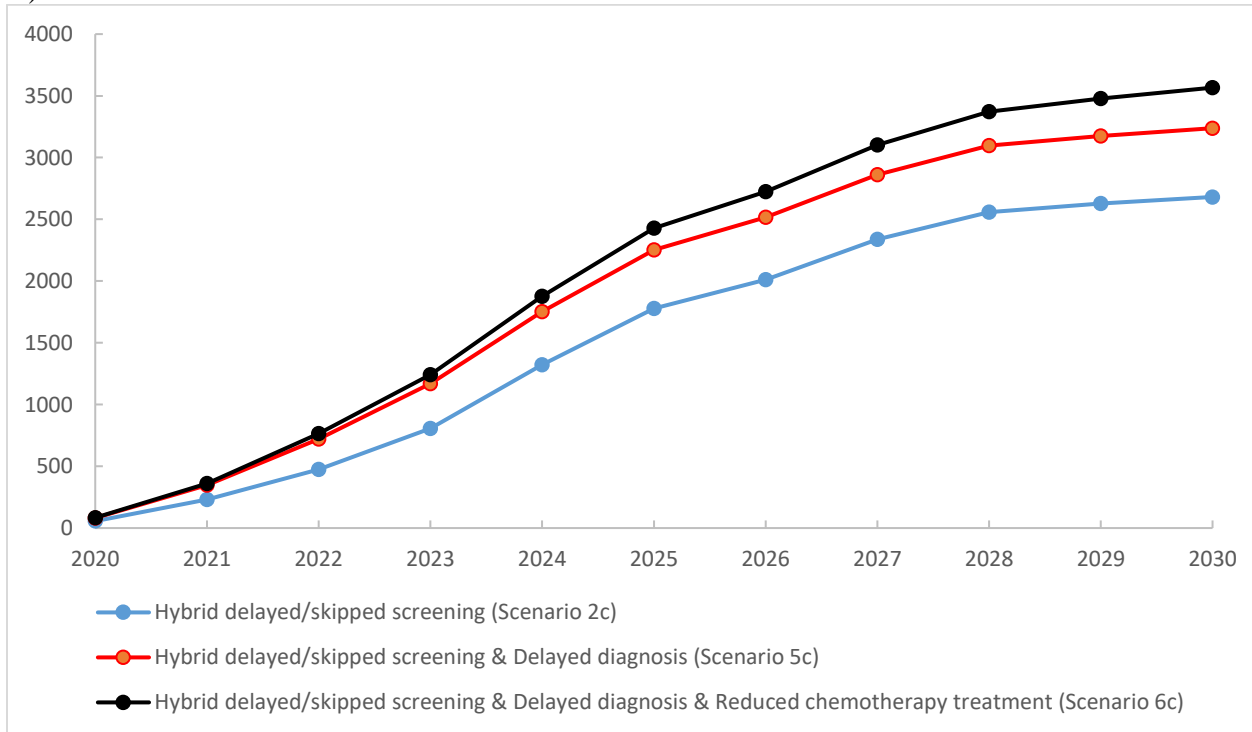

Supplement: djab097_supplementary_data.pdf [file djab097_supplementary_data.pdf]
